# Supplementary material for: Top-down fabrication of nano-scaled Bi2Se0.3Te2.7associated by electrochemical Li intercalation
Source: Royal Society of Chemistry journal article supplement (doi:10.1039/c0dt01281e), 2010-11-17
Supplement: c0dt01281e.pdf [file c0dt01281e.pdf]

## Electronic Supporting information

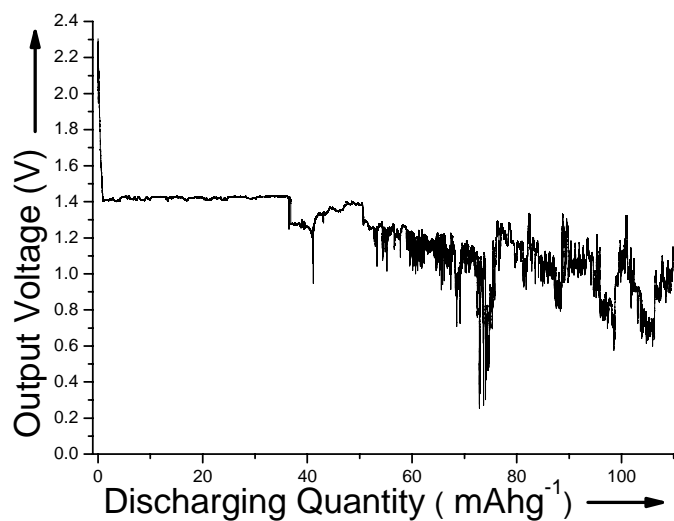

**Figure S1.** Discharging curve of the self-assembled battery used for electrochemical Li intercalation process, discharging by 0.3 mA electric current.

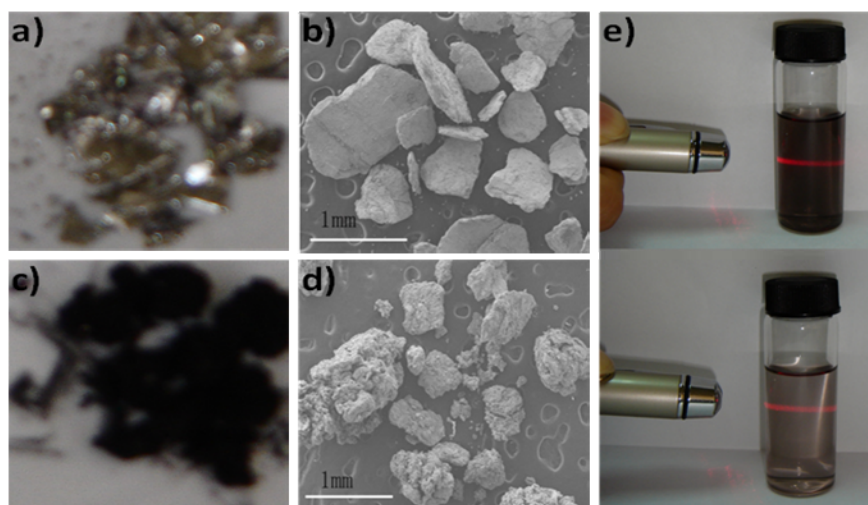

**Figure S2.** a), b) Photograph and SEM micrograph of pristine micro-scaled Bi<sub>2</sub>Se<sub>0.3</sub>Te<sub>2.7</sub> powder; c), d) Photograph and SEM micrograph of Li<sub>0.89</sub>Bi<sub>2</sub>Se<sub>0.3</sub>Te<sub>2.7</sub> powder after Li intercalation (1 mA, Li amount: 30 mAh/g); e) The colloidal suspensions of as-produced Bi<sub>2</sub>Se<sub>0.3</sub>Te<sub>2.7</sub> nano-particles with different densities.

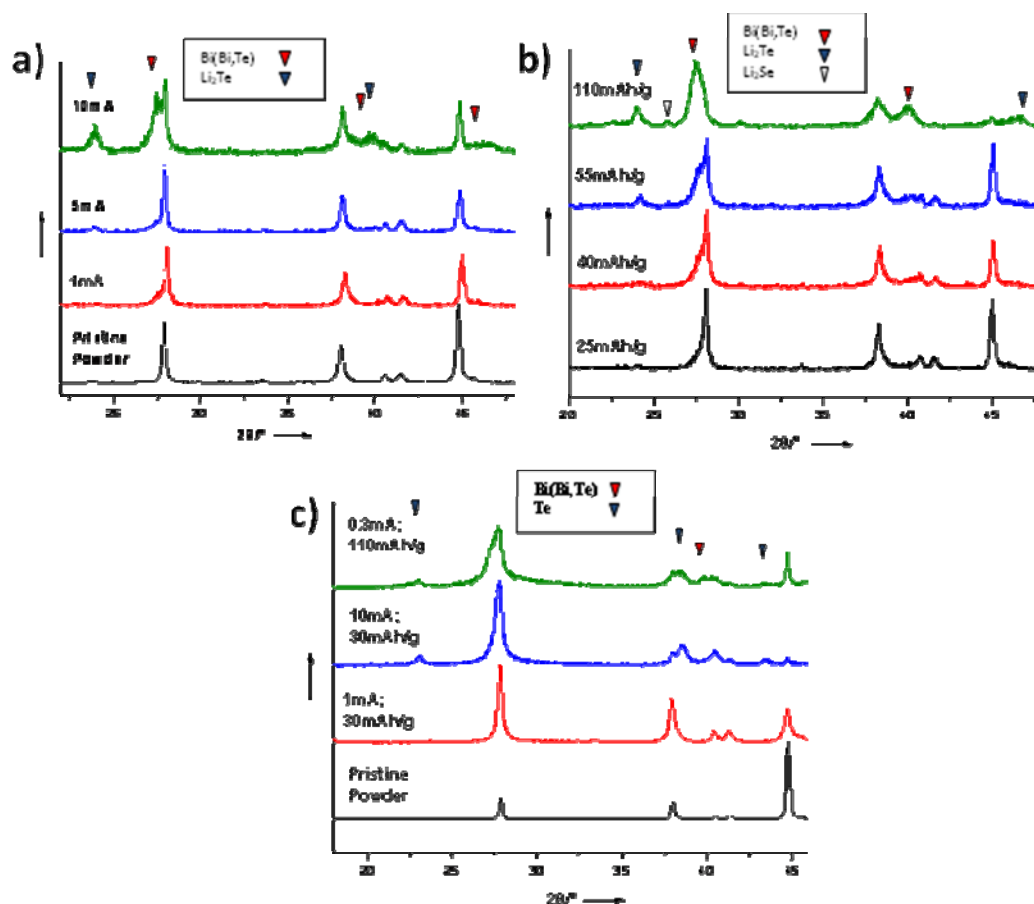

**Figure S3.** a) XRD patterns of  $\text{Li}_{0.89}\text{Bi}_2\text{Se}_{0.3}\text{Te}_{2.7}$  powders with the same Li intercalating amount of  $Q/m=30\text{mAh/g}$  using different magnitudes of discharging currents. b) XRD patterns of  $\text{Li}_y\text{Bi}_2\text{Se}_{0.3}\text{Te}_{2.7}$  powders with different Li intercalating amounts using the same discharging current of 0.3mA. c) XRD patterns of water exposed products.
